# Supplementary material
Source: PubMed Central journal article supplement (PMC5501745)
Supplement: NIHMS857749-supplement-11764_2017_610_MOESM1_ESM.pdf [file NIHMS857749-supplement-11764_2017_610_MOESM1_ESM.pdf]

**Q19: What type of chemotherapy did you receive as part of your BREAST cancer treatment? Select all that apply.**

Question Type: Check all that apply

Answer options:

- CMF: cyclophosphamide (Cytoxan), methotrexate, and 5-fluorouracil (5-FU)
- AC: doxorubicin (Adriamycin) and cyclophosphamide (Cytoxan)
- CAF (FAC): cyclophosphamide (Cytoxan), doxorubicin (Adriamycin), and 5-fluorouracil (5-FU)
- CEF/FEC : cyclophosphamide (Cytoxan), epirubicin (Ellence), and 5-fluorouracil (5-FU)
- MF: methotrexate and 5-fluorouracil (5-FU)
- TAC: docetaxel (Taxotere), doxorubicin (Adriamycin), and cyclophosphamide (Cytoxan)
- Trastuzumab (Herceptin) or lapatinib (Tykerb) with paclitaxel (Taxol) with or without carboplatin
- Don't know specific type
- Other
